# Supplementary material
Source: HighWire-hosted journal article supplement (https://bmjopen.bmj.com/content/10/3/e033026)
Supplement: inline-supplementary-material-1 [file inline-supplementary-material-1.pdf]

## Questionnaire

### Affective risk perception

Recently, the number of MERS patients, suffering from Middle East respiratory syndrome is increasing in Korea.

“How much worried are you that you could get MERS?”

1. Very much worried
2. Somewhat worried
3. Not that worried
4. Not worried at all

### Cognitive risk perception

“Do you think MERS epidemic will settle down in the next few days or spread further?”

1. Will settle down
2. Will spread further

### Trust in government (presidential job approval rating)

“Do you approve or disapprove of the way President Park Geun-hye is handling her job as president?”

1. Approval
2. Disapproval

### Party identification

These days, there are Saenuri Party, New Politics Alliance for Democracy, and Justice party in South Korea.

“Which party do you support?”

1. Saenuri Party
2. New Politics Alliance for Democracy
3. Justice party
4. Other parties

### Occupation

“What is your occupation?”

1. farming/forestry/fishery
2. Self-employed

3. Blue collar (Sales/services, Functional/skilled workers, general workers)
4. White collar (office/technical position, management, professional/freelancer)
5. Homemaker
6. Student
7. Unemployed
8. Retired
9. Other

### **Self-reported household economic status**

“If you divide the standards of living of Korean people into five levels: Upper, Upper middle, Middle, Lower middle, and Lower, which level do you think your household’s living standard belongs to?”

1. Upper
2. Upper middle
3. Middle
4. Lower middle
5. Lower

### **Educational attainment**

“What is the highest degree or level of school you have completed?”

1. Middle school or below
2. High school
3. University
4. Graduate school

### **Area**

Which region do you live in? Please tell me based on your address.

\*We don't have your location information because we've randomly generated your telephone number.

1. Seoul
2. Busan
3. Daegu
4. Incheon
5. Gwangju

6. Daejeon
7. Ulsan
8. Sejong
9. Gyeonggi
10. Gangwon
11. Chungbuk
12. Chungnam
13. Jeonbuk
14. Jeonnam
15. Gyeongbuk
16. Gyeongnam
17. Jeju

**Age**

What is your age?

**Gender**

What is your gender?

1. Male
2. Female
